# Supplementary material for: Extracellular polymeric substances protect Escherichia coli from organic solvents
Source: Royal Society of Chemistry journal article supplement (doi:10.1039/c6ra11707d), 2016-01-01
Supplement: c6ra11707d1.pdf [file c6ra11707d1.pdf]

**Electronic Supplementary Information**

**Table S1** Contents of EPS extracted from *E. coli* cultivated with different *n*-BuOH for 12 h.

| <i>n</i> -BuOH | PN          | PS          | PN/PS       |
|----------------|-------------|-------------|-------------|
| 0              | 1.34 ± 0.25 | 1.15 ± 0.15 | 1.11 ± 0.40 |
| 0.25%          | 3.01 ± 0.51 | 2.58 ± 0.22 | 1.17 ± 0.12 |
| 0.50%          | 5.00 ± 0.69 | 2.53 ± 0.18 | 1.98 ± 0.13 |
| 0.75%          | 2.44 ± 0.45 | 1.52 ± 0.72 | 1.88 ± 1.18 |

**Table S2** Band Assignments for FTIR Spectra of EPS

| <b>Wavenumber</b>          | <b>Functional Groups</b>                                                                                                             |
|----------------------------|--------------------------------------------------------------------------------------------------------------------------------------|
| ~1625 cm <sup>-1</sup>     | C=O stretching of amides associated with proteins (Amide I band).                                                                    |
| ~1476 cm <sup>-1</sup>     | Asymmetric deformation of CH <sub>3</sub> and CH <sub>2</sub> of proteins.                                                           |
| ~1395 cm <sup>-1</sup>     | Symmetric deformation of CH <sub>3</sub> and CH <sub>2</sub> of proteins and symmetric stretching of C=O of COO <sup>-</sup> groups. |
| ~1224 cm <sup>-1</sup>     | Asymmetric stretching P=O of phosphodiester backbone of nucleic acid or phosphorylated proteins.                                     |
| ~1200-900 cm <sup>-1</sup> | C–O–C of polysaccharides.                                                                                                            |

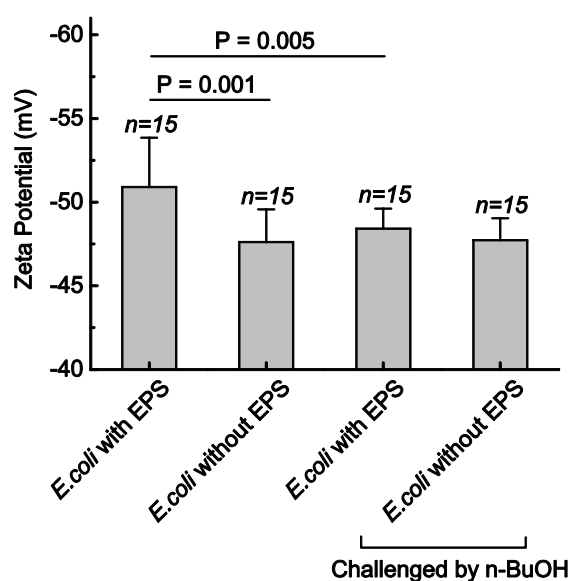

**Fig. S1** Zeta potentials of *E. coli* cells before and after challenged by *n*-BuOH. Overnight culture of *E. coli* was inoculated and cultivated for 12 h, followed by the EDTA method to extract EPS. The cells with and without EPS were challenged by 0.50% *n*-BuOH, and the Zeta potentials were measured by a Zetasizer. The results were identified by the Student's t-test.

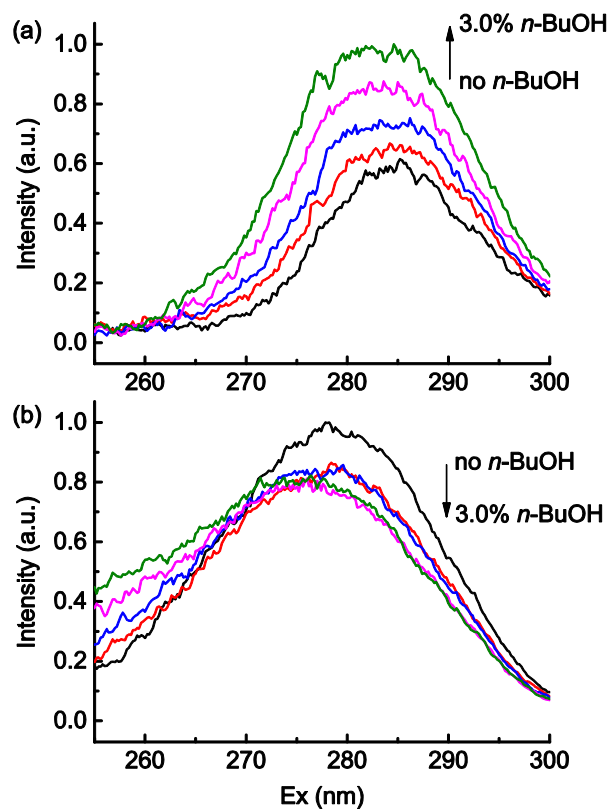

15

16 **Fig. S2** The in situ synchronous fluorescence spectra of BSA. Different amounts of *n*-BuOH  
 17 were added into BSA ( $10^{-5}$  mol/L) buffered by PBS (pH 7.4) to the final concentration of 0.50,  
 18 0.10, 0.20 and 0.30%. The synchronous fluorescence spectra were then measure by the  
 19 fluorescence spectroscopy with a constant difference, while  $\Delta\lambda = 15$  nm for Tyr residues (a)  
 20 and  $\Delta\lambda = 60$  nm for Trp residues (b).
